# Supplementary material for: Effects of Selected Nigerian Medicinal Plants on the Viability, Mobility, and Multidrug-Resistant Mechanisms in Liver, Colon, and Skin Cancer Cell Lines
Source: PubMed Central journal article supplement (PMC7533547; doi:10.3389/fphar.2020.546439), 2020-09-15
Supplement: DataSheet_1.pdf [file DataSheet_1.pdf]

**Effects of selected Nigerian medicinal plants on the viability, mobility and multidrug-resistant mechanisms in liver, colon and skin cancer cell lines.****Aljawharah AlQathama<sup>1,2\*</sup>, Udoamaka F. Ezuruike<sup>1</sup>, Andre L. D. A. Mazzari<sup>1</sup>, Ahmed Yombawi<sup>1,3</sup>, Elisabetta Chieli<sup>4</sup>, Jose M. Prieto<sup>1</sup>**

1. School of Pharmacy, University College London, 29-39 Brunswick Square, WC1N 1AX London, United Kingdom.

2. Department of Pharmacognosy, Faculty of Pharmacy, Umm Al-Qura University, Makkah, 21955, Saudi Arabia.

3. Department of Natural Products and Alternative Medicine, Faculty of Pharmacy, King Abdulaziz University, Jeddah, Saudi Arabia.

4. Department of Translational Research and New Technologies in Medicine and Surgery, University of Pisa, Italy.

(\*) Correspondence author: [aaqathama@uqu.edu.sa](mailto:aaqathama@uqu.edu.sa)

**Keywords: Cell viability<sub>1</sub>; Cell migration<sub>2</sub>; Multi Drug Resistance<sub>3</sub>; Tyrosinase<sub>4</sub>; Medicinal Plants<sub>5</sub>**

## 1 HPLC FINGERPRINTS - ANALYSIS

The elution conditions previously described in material and methods allowed for a good separation of all the fifteen phytochemical standards. The chromatogram obtained is shown below (Supplementary Figure 1S). A HPLC-UV fingerprint for each of the plant extracts (50 micrograms/mL) was also obtained under the same chromatographic conditions (Supplementary Figures 2S-27S).

### Supplementary Figure 1S. HPLC-UV chromatogram of phytochemical standards (254nm)

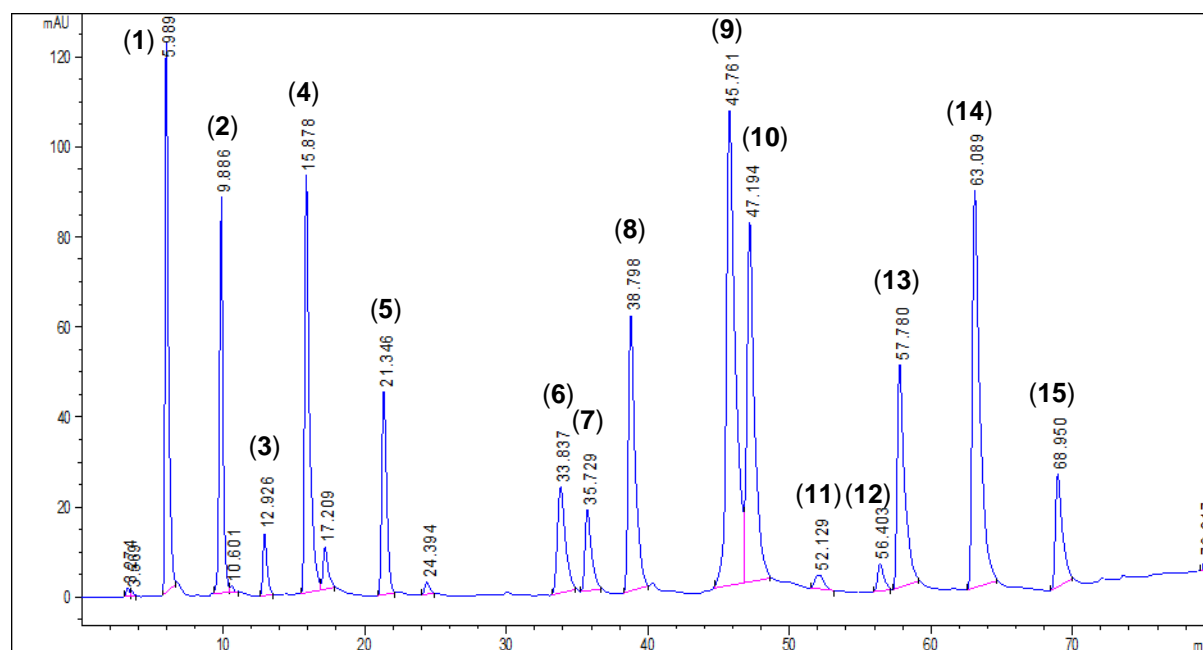

(1) Gallic acid, (2) 2,4-dihydroxybenzoic acid, (3) Caffeic acid, (4) Epicatechin, (5) Epigallocatechin, (6) Catechin, (7) Vitexin rhamnoside, (8) Vitexin, (9) Rutin, (10) Ellagic acid, (11) Quercitrin, (12) Hesperidin, (13) Quercetin, (14) Luteolin and (15) Kaempferol. Each standard was present in the cocktail at a final concentration of 1mg/ml.

Supplementary Figure 2S. HPLC chromatogram (254 nm) of *A. boonei* (voucher no. SOP052011AB01)

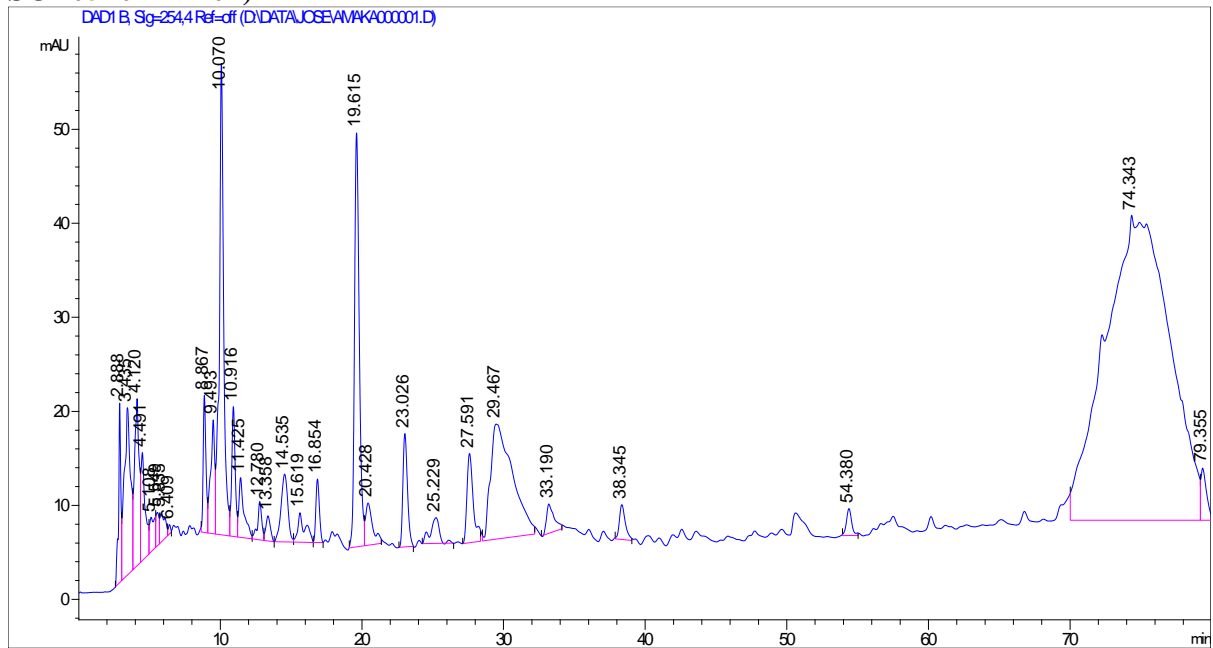

Supplementary Figure 3S. HPLC chromatogram (254 nm) of *A. leiocarpus* (voucher no. SOP052011AL01)

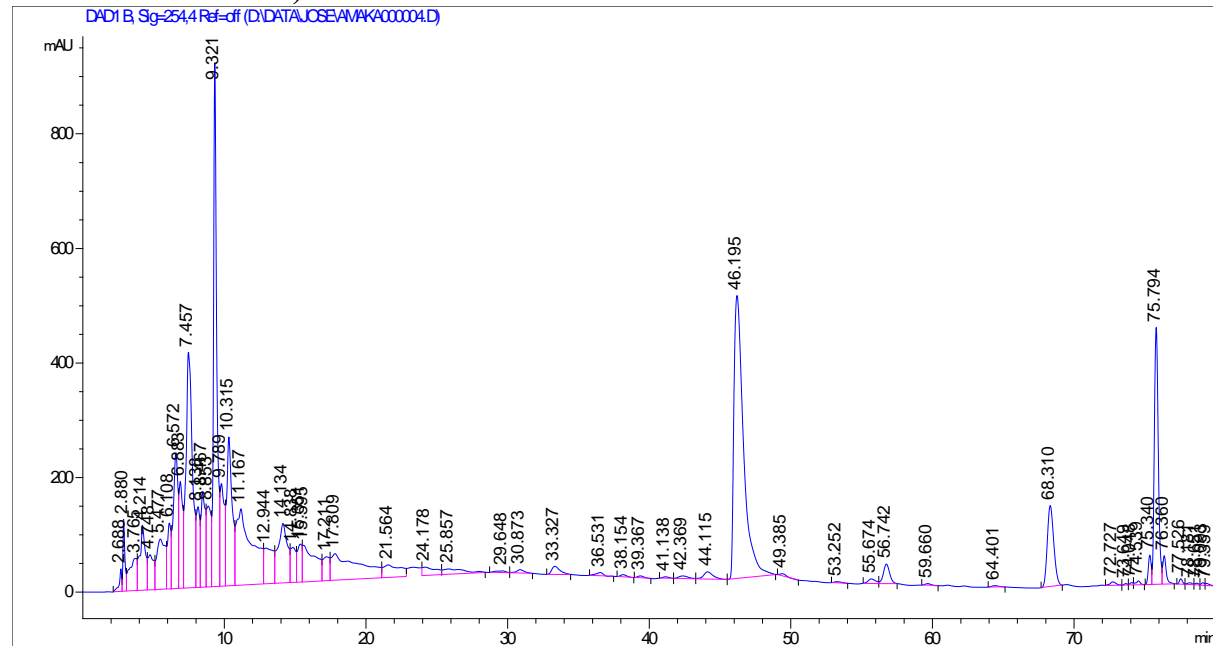

Supplementary Figure 4S. HPLC chromatogram (254 nm) of *A. senegalensis* (voucher no. SOP052011AS01)

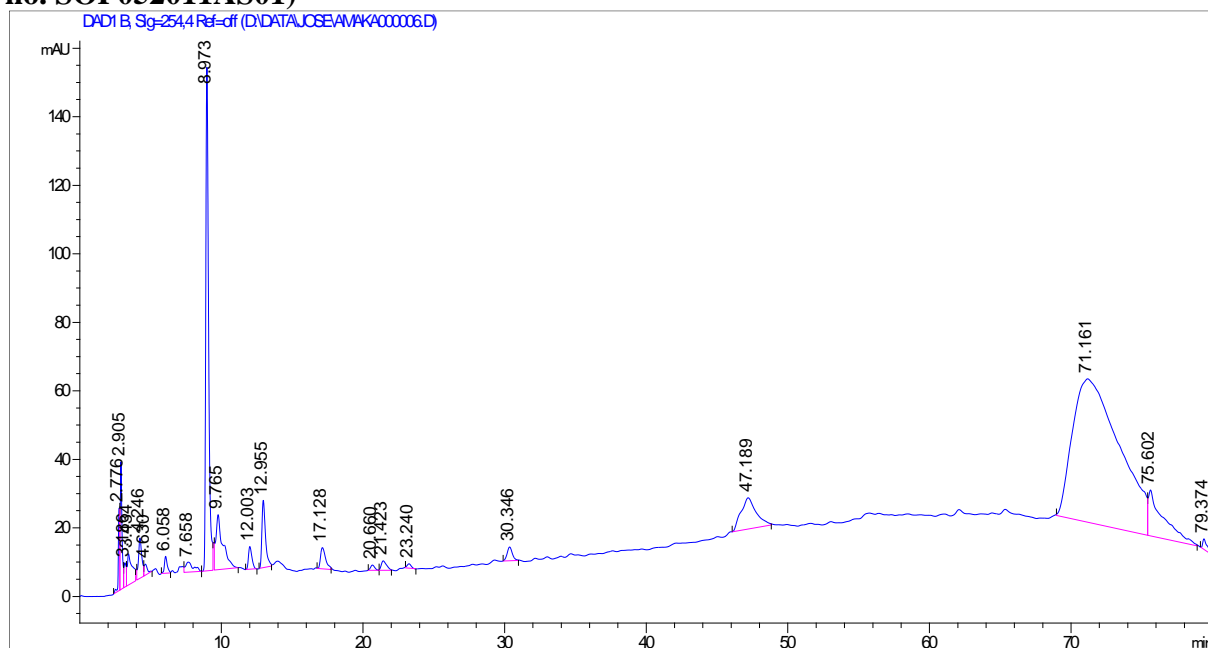

Supplementary Figure 5S. HPLC chromatogram (254 nm) of *A. djalensis* (voucher no. SOP052011AD01)

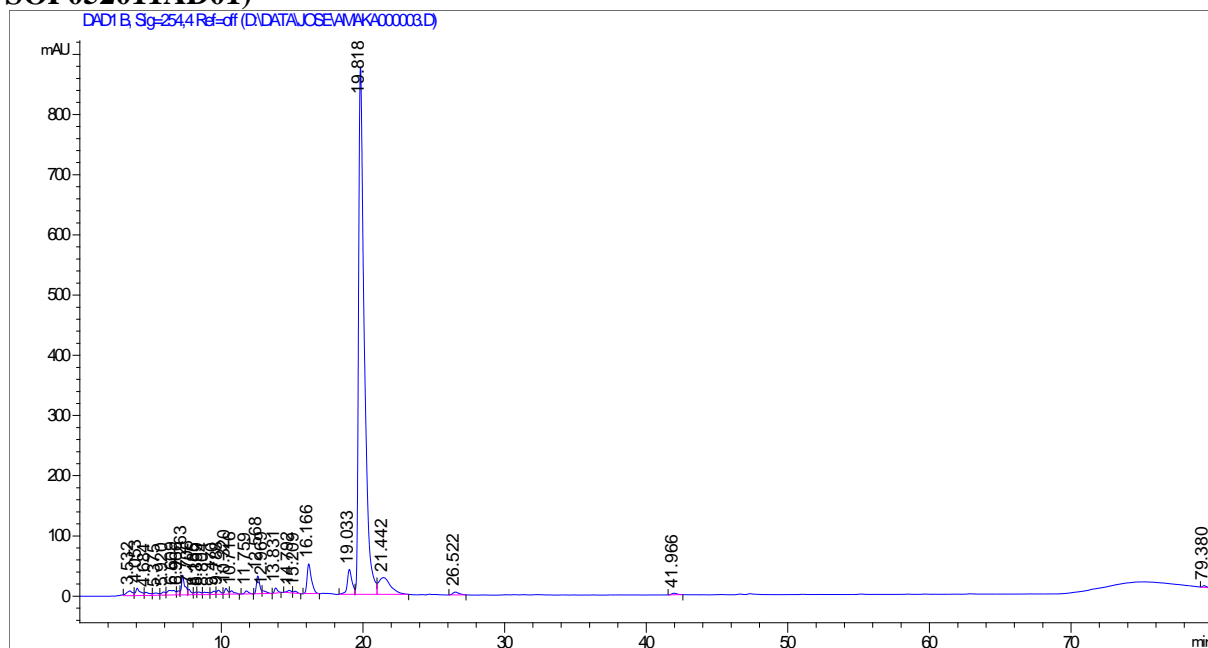

Supplementary Figure 6S. HPLC chromatogram (254 nm) of *A. repens* (voucher no. SOP052011AR01)

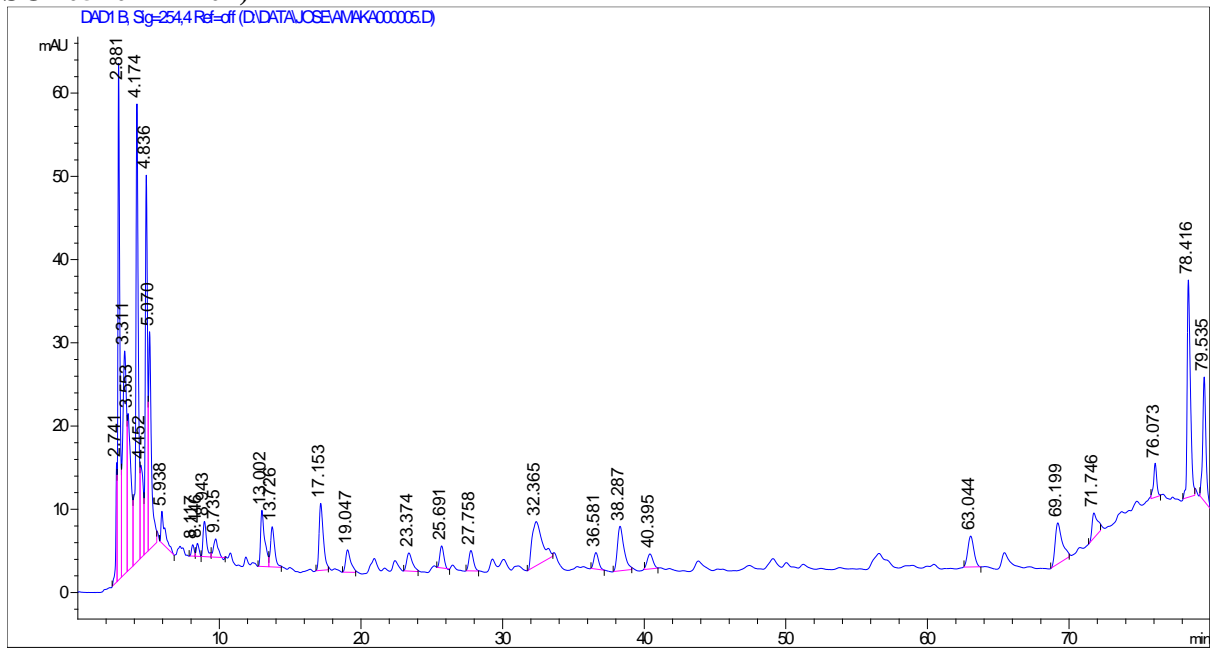

Supplementary Figure 7 S. HPLC chromatogram (254 nm) of *B. ferruginea* (voucher no. SOP052011BF01)

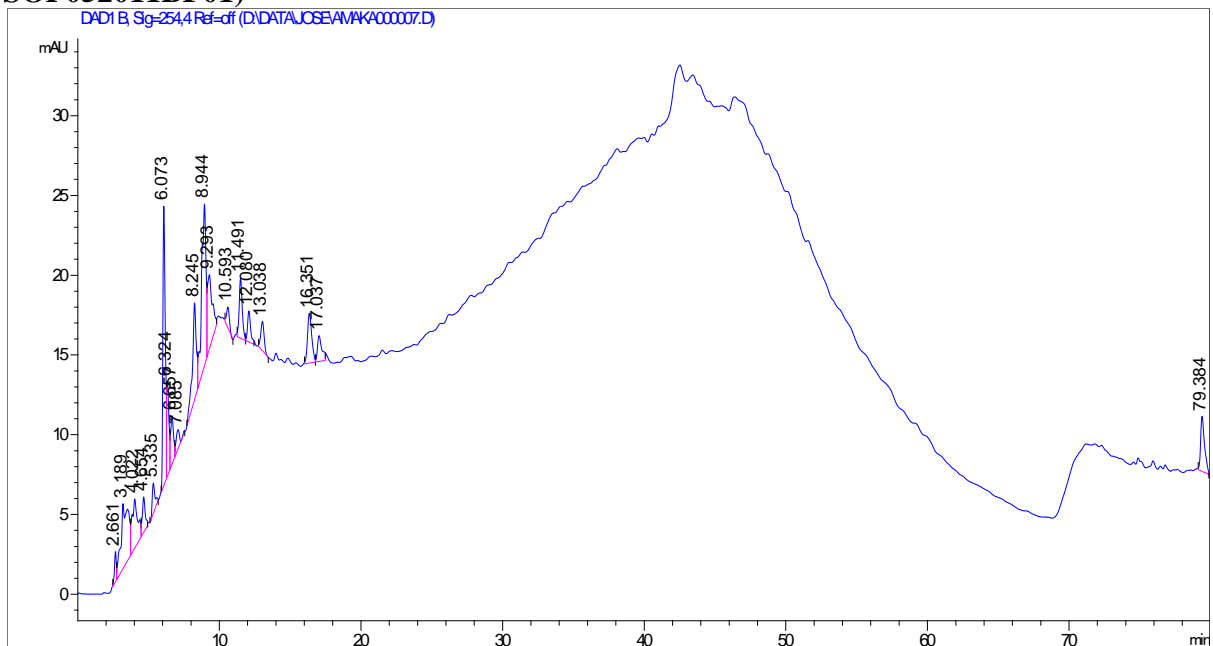

**Supplementary Figure 8 S. HPLC chromatogram (254 nm) of *C. sieberiana* (voucher no. SOP052011CS01)**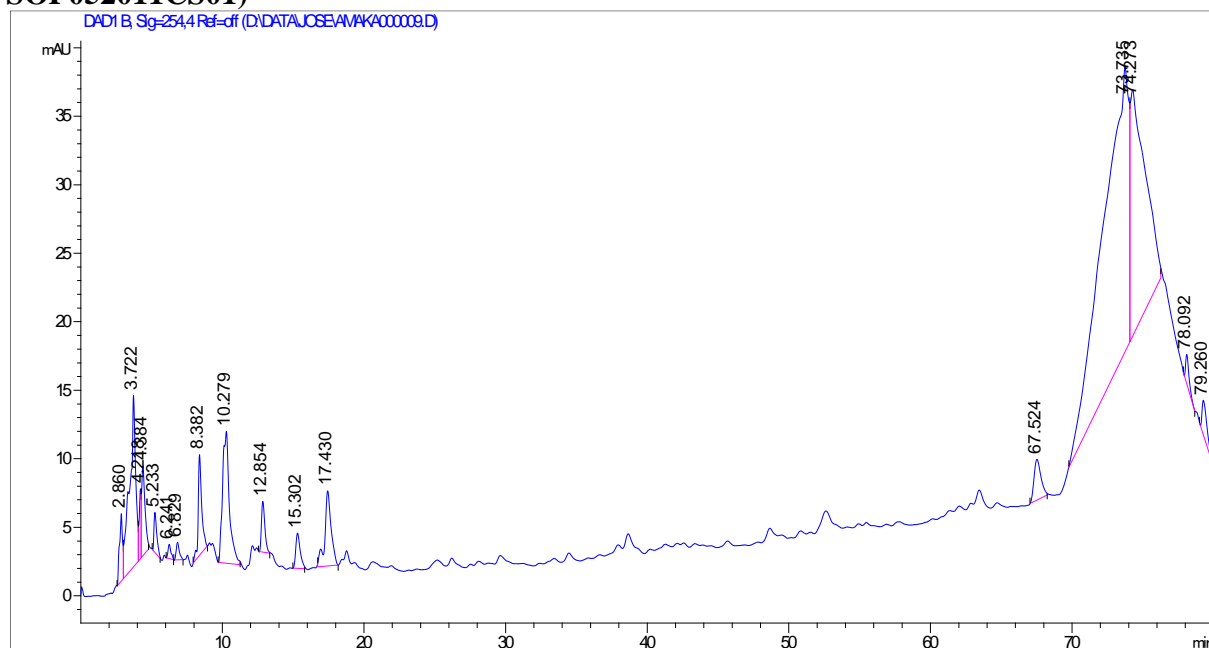**Supplementary Figure 9 S. HPLC chromatogram (254 nm) of *C. filiformis* (voucher no. SOP052011CF01)**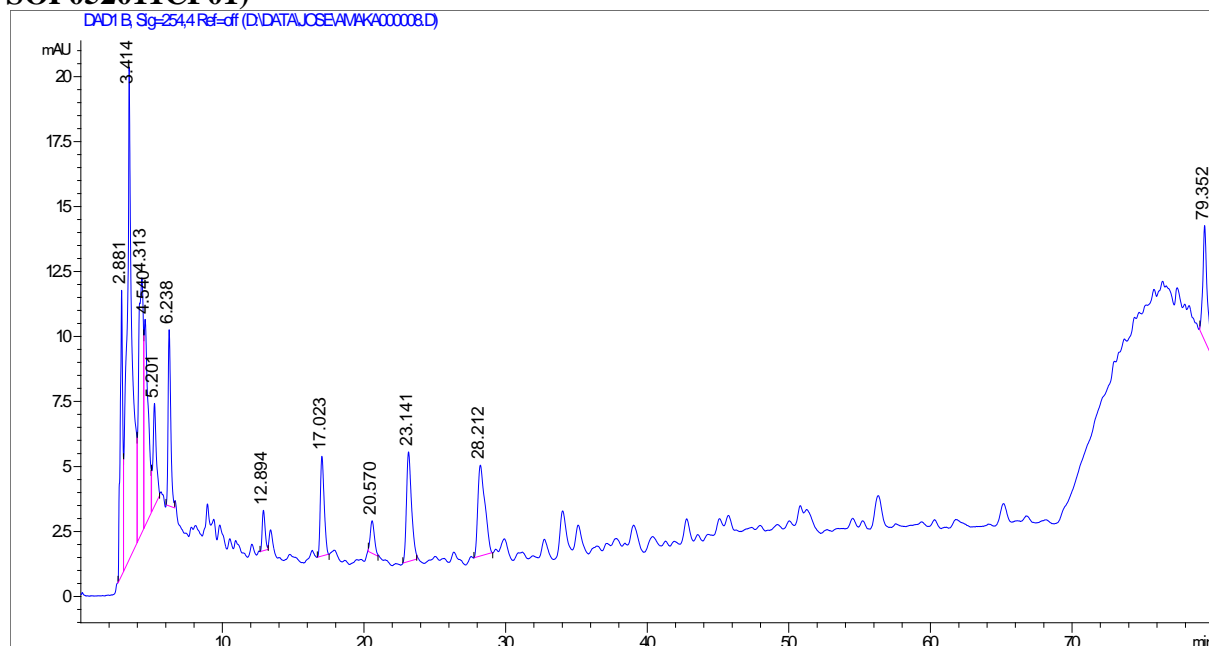

Supplementary Figure 10S. HPLC chromatogram (254 nm) of *D. ogea* (voucher no. SOP052011DO01)

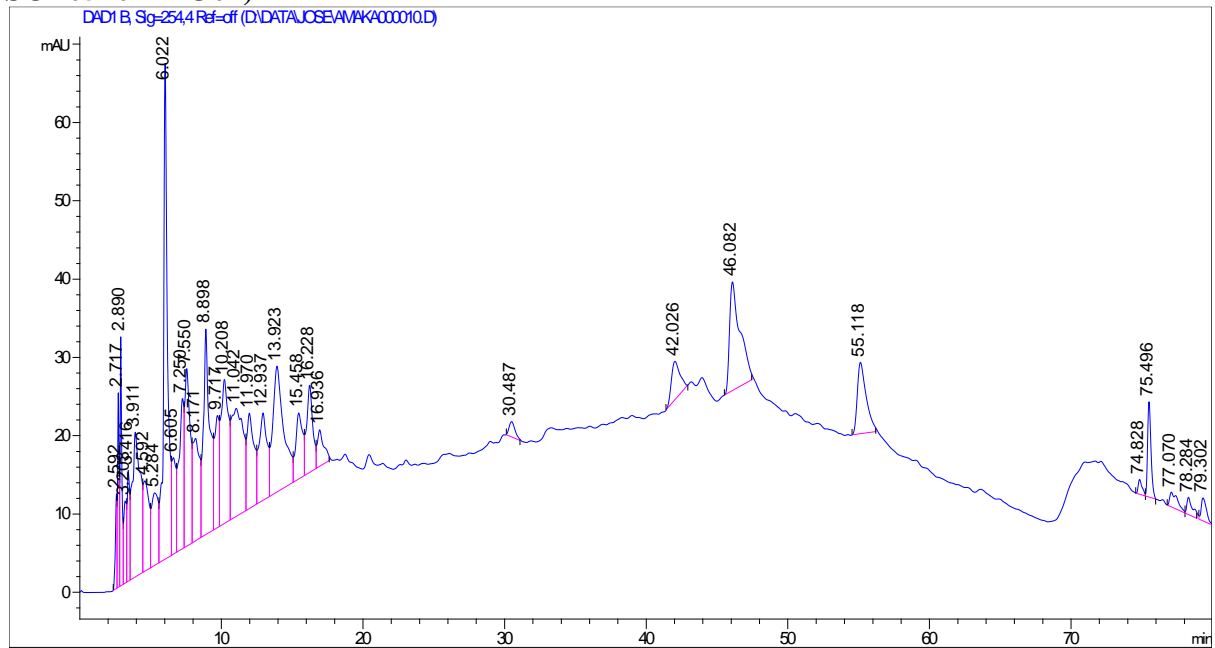

Supplementary Figure 11S. HPLC chromatogram (254 nm) of *G. latifolium* (voucher no. SOP052011GL01).

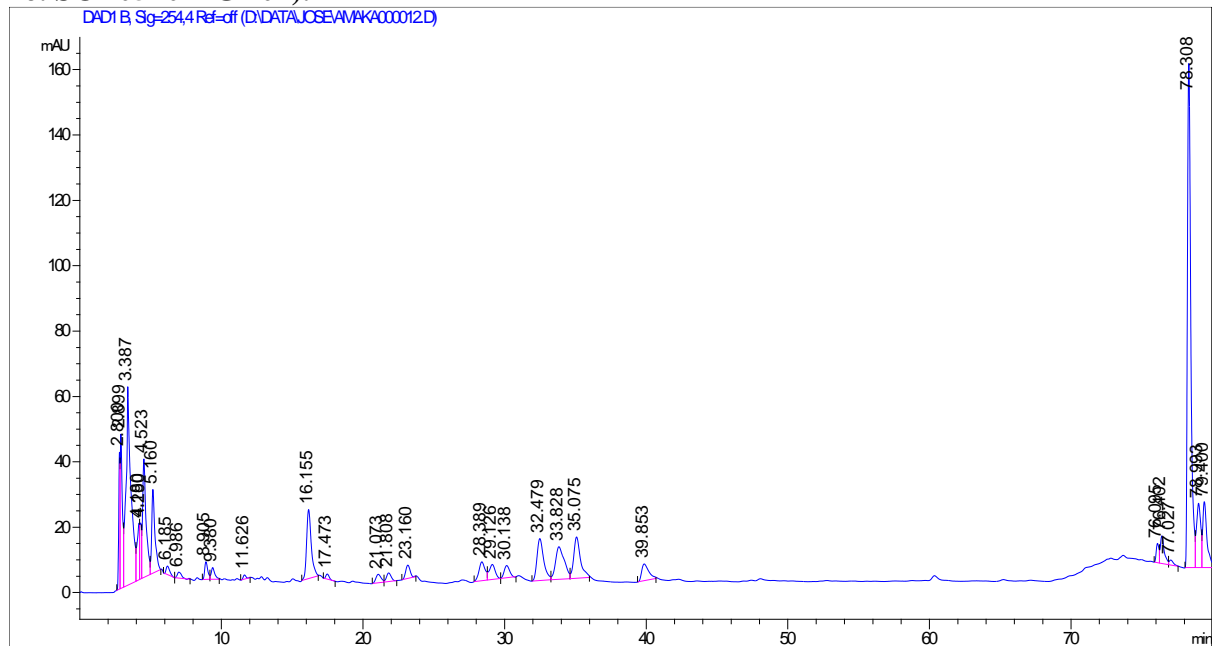

Supplementary Figure 12S. HPLC chromatogram (254 nm) of *I. doka* (voucher no. SOP052011ID01)

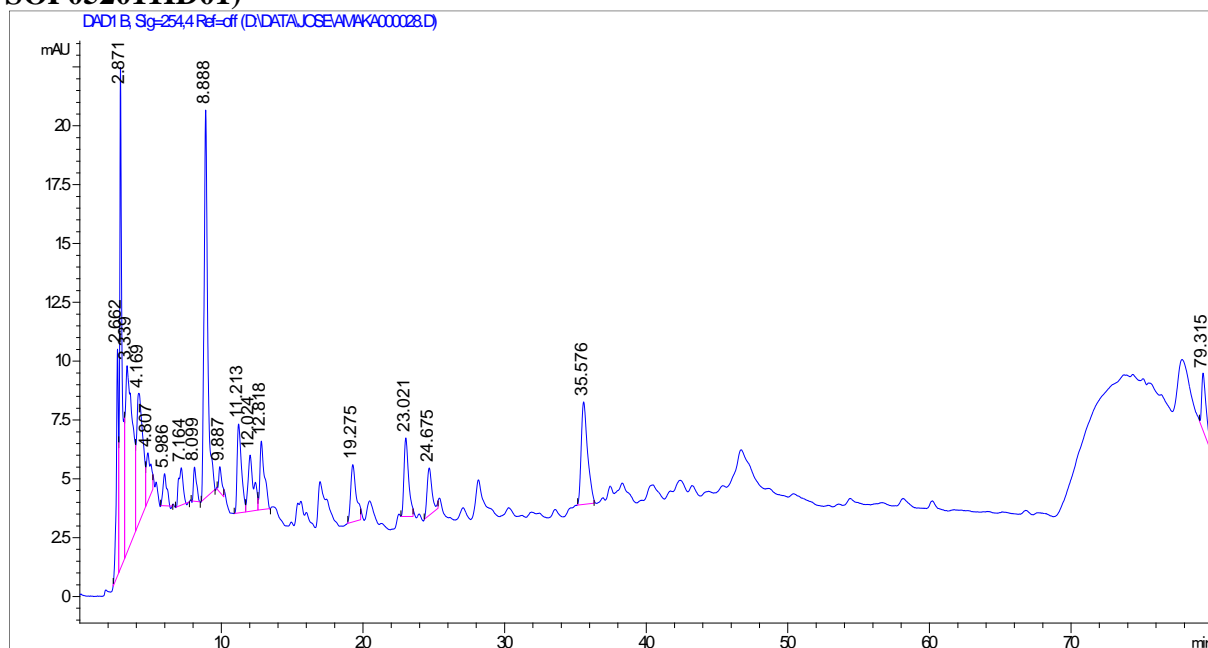

Supplementary Figure 13S. HPLC chromatogram (254 nm) of *K. ivorensis* (voucher no. SOP052011KI02)

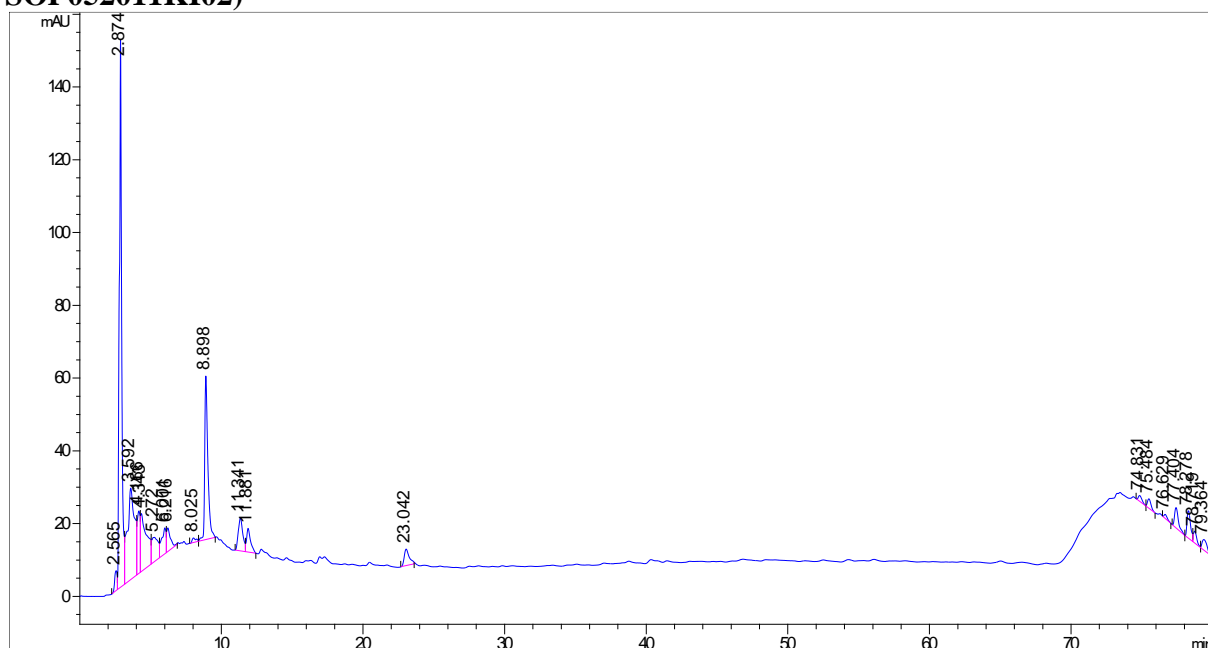



**Supplementary Figure 14S. HPLC chromatogram (254 nm) of *K. senegalensis* (voucher no. SOP052011KS01)**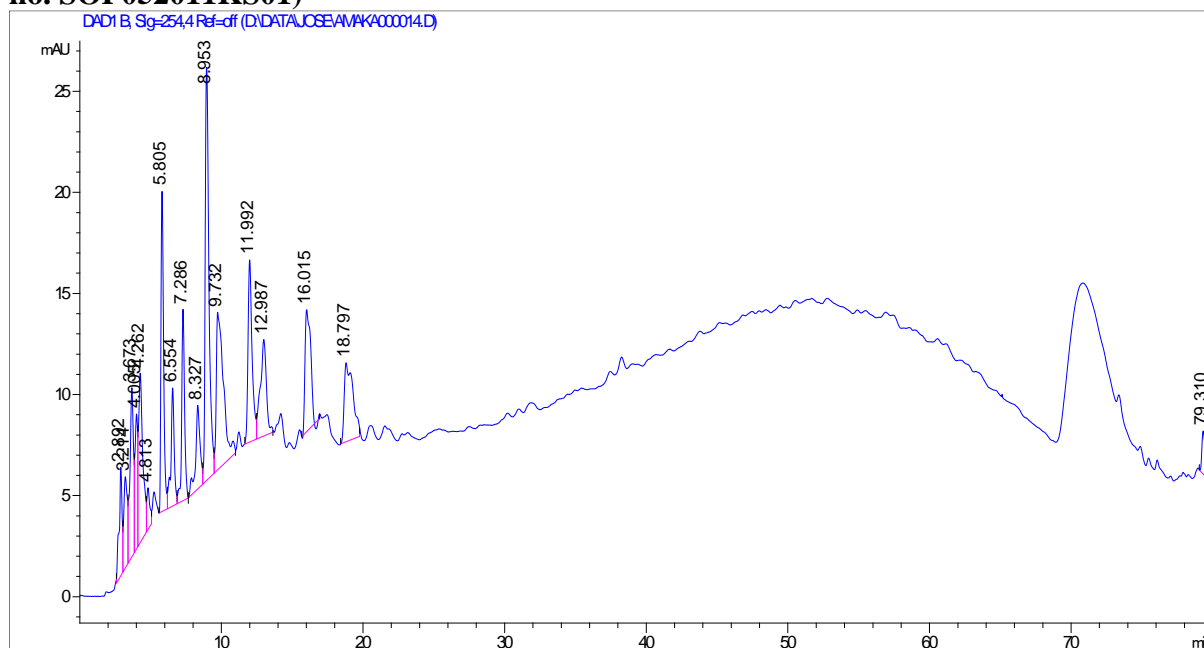**Supplementary Figure 15S. HPLC chromatogram (254 nm) of *M. whitei* (voucher no. SOP052011MW01)**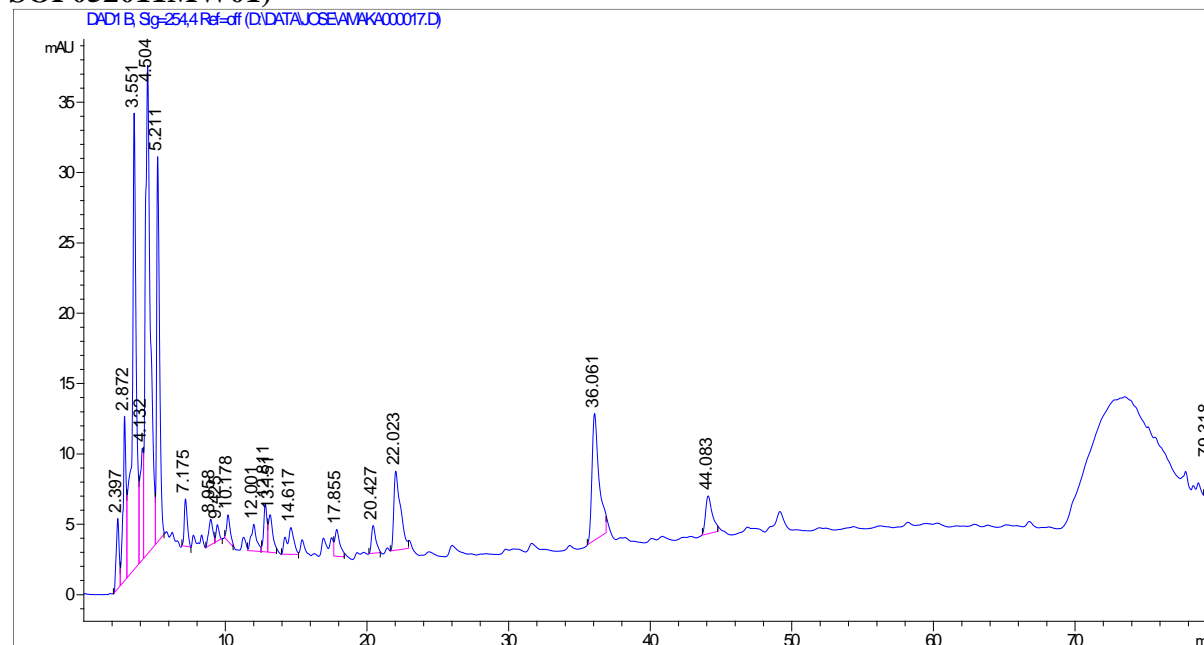

Supplementary Figure 16S. HPLC chromatogram (254 nm) of *M. oleifera* (voucher no. SOP052011MO01)

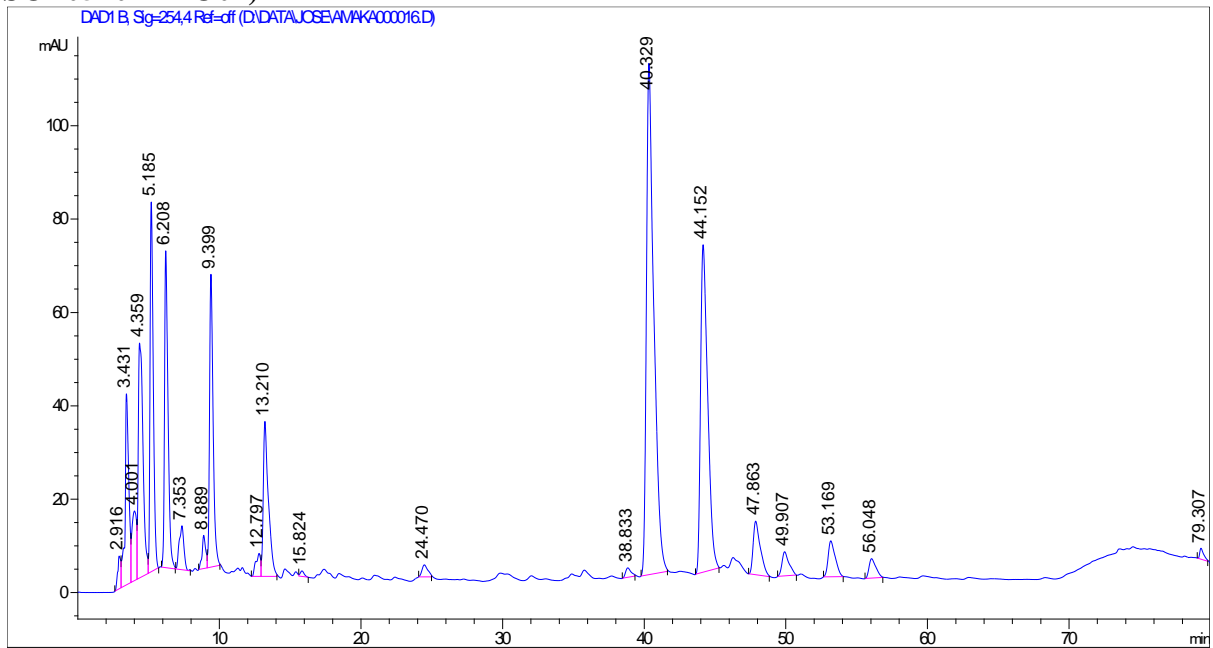

Supplementary Figure 17S. HPLC chromatogram (254 nm) of *O. gratissimum* (voucher no. SOP052011OG01)

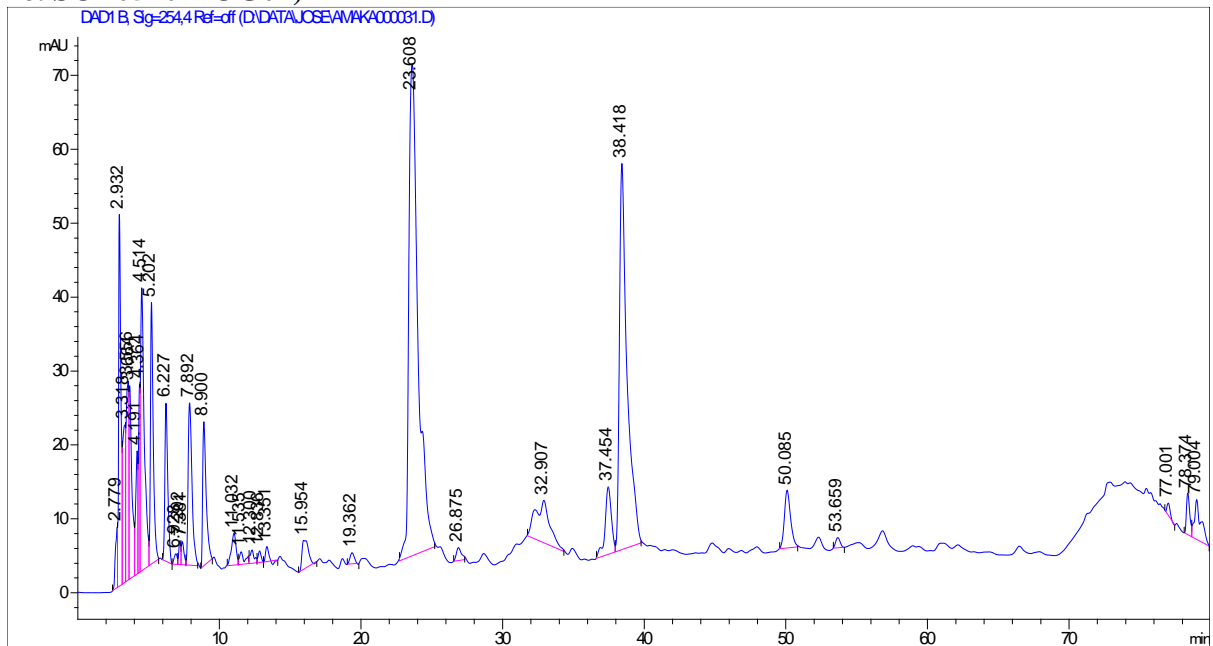

Supplementary Figure 18S. HPLC chromatogram (254 nm) of *P. nitida* (voucher no. SOP052011PN01)

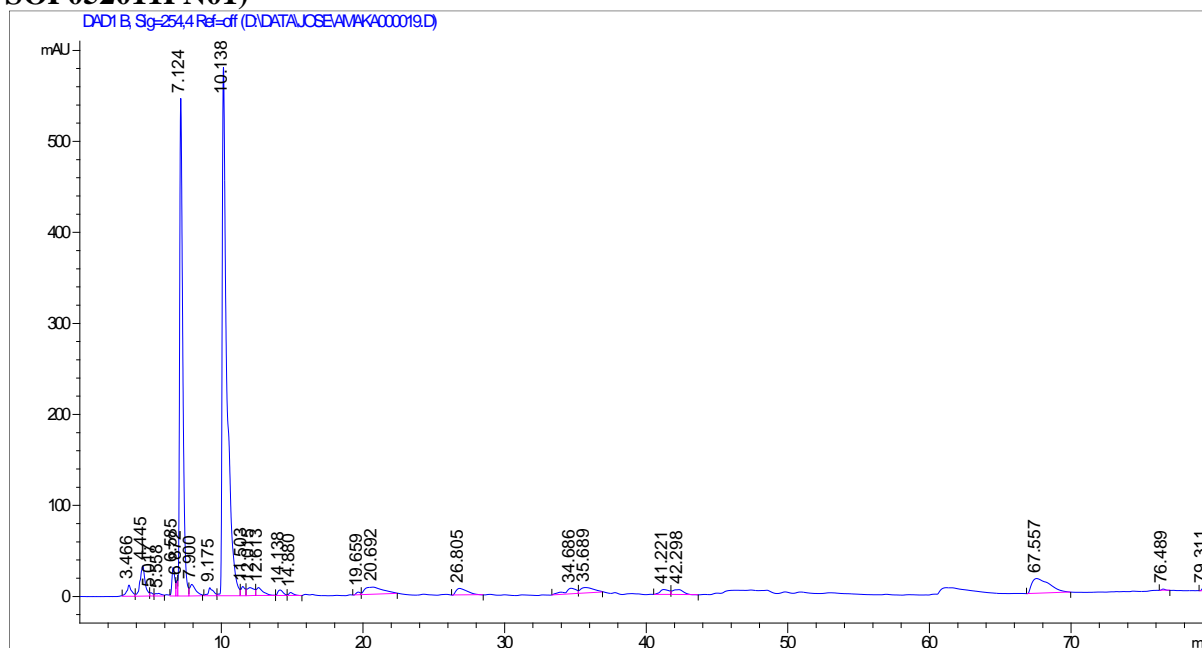

Supplementary Figure 19S. HPLC chromatogram (254 nm) of *R. vomitoria* (voucher no. SOP052011RV01)

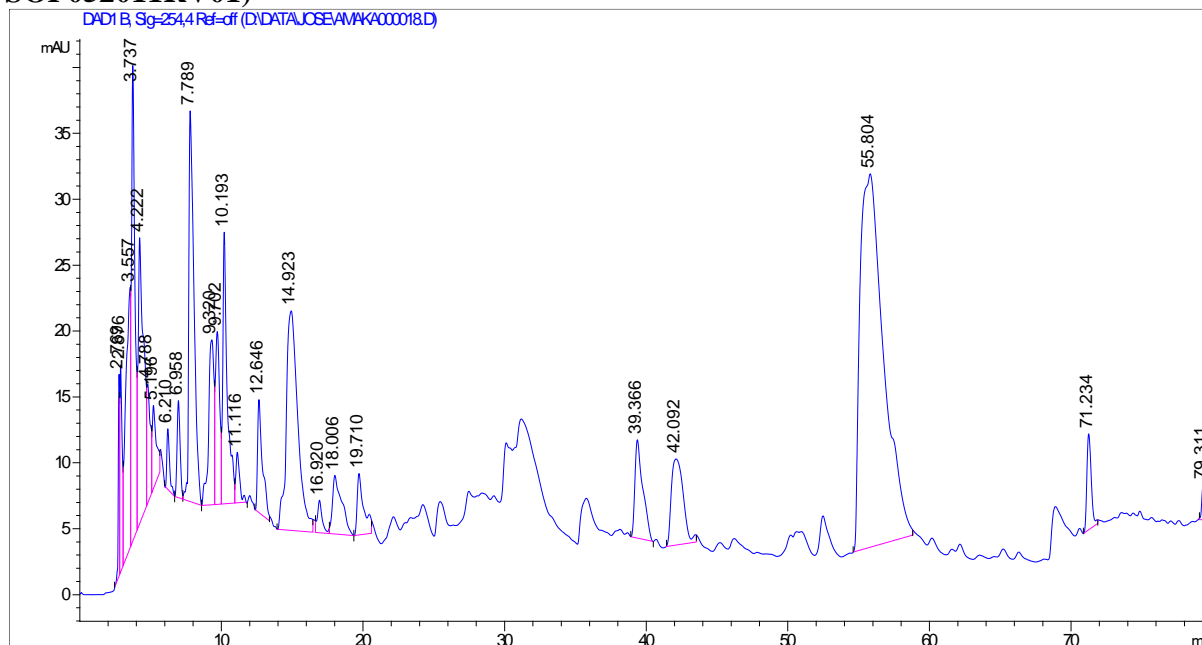



Supplementary Figure 22S. HPLC chromatogram (254 nm) of *S hispidus* (voucher no. SOP052011SH01)

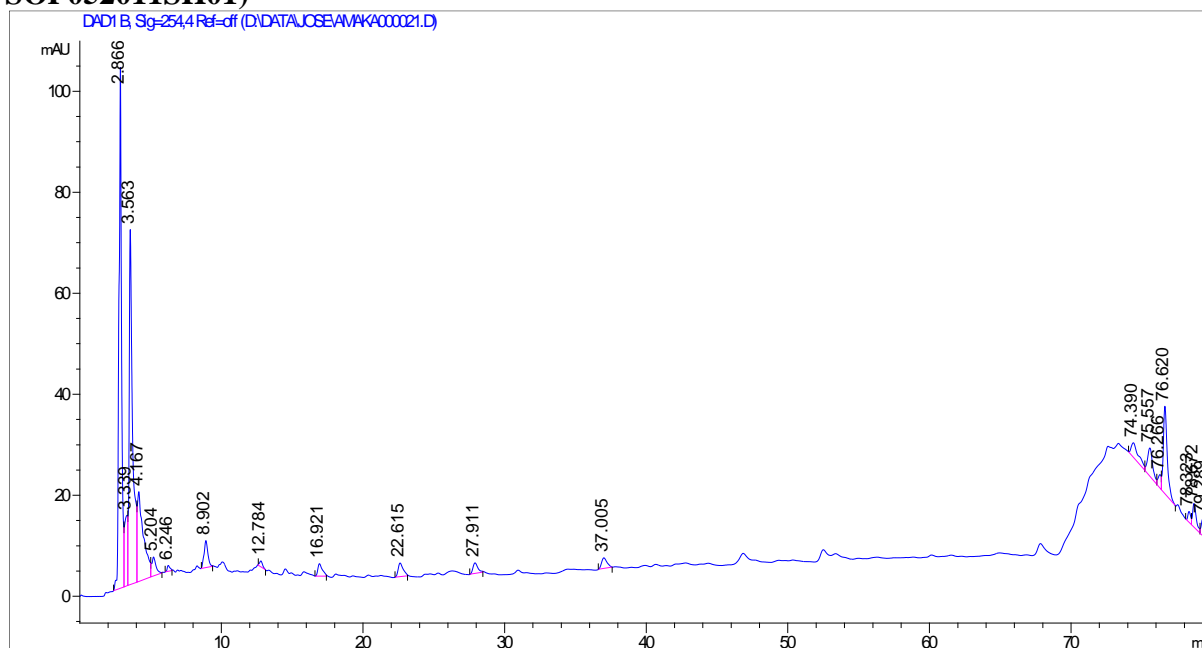

Supplementary Figure 23S. HPLC chromatogram (254 nm) of *S. guineense* (voucher no. SOP052011SG01)

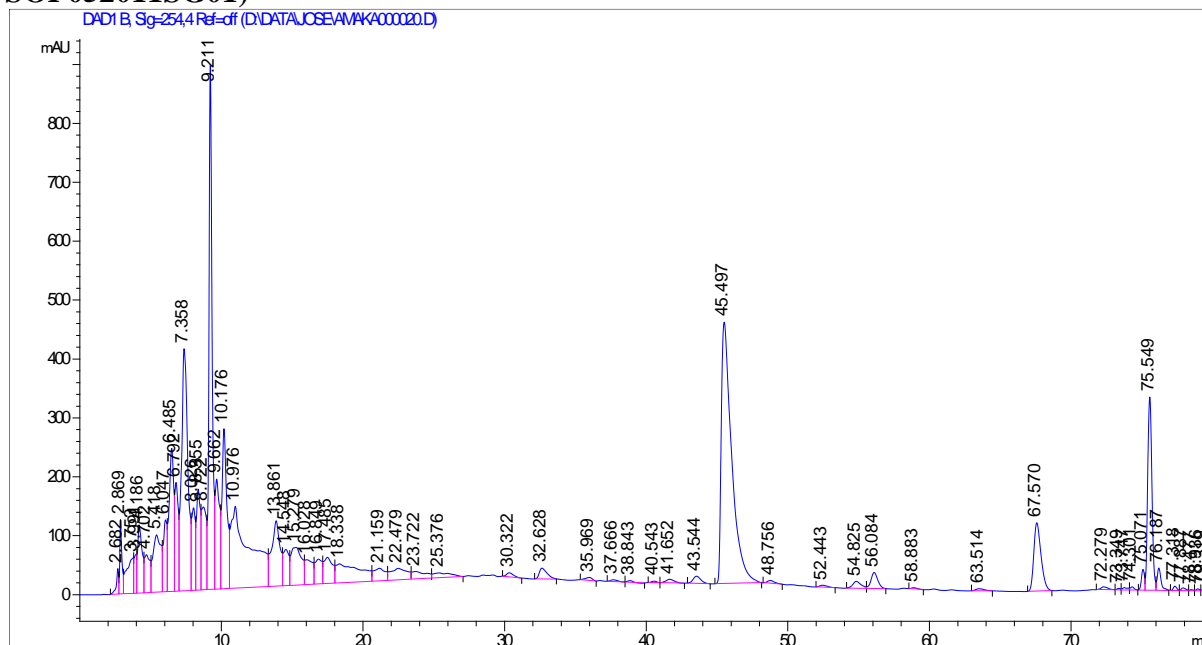

Supplementary Figure 24S. HPLC chromatogram (254 nm) of *Tamarindus indica* (voucher no. SOP052011TI01)

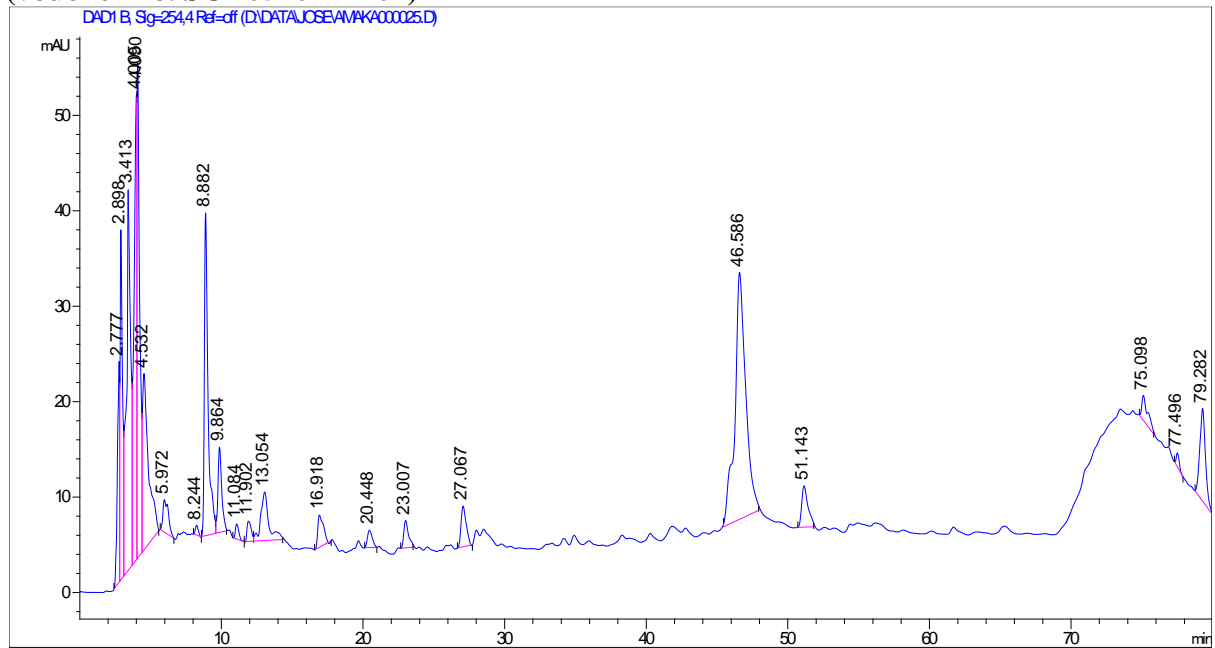

Supplementary Figure 25S. HPLC chromatogram (254 nm) of *T. avicenoides* (voucher no. SOP052011TA01)

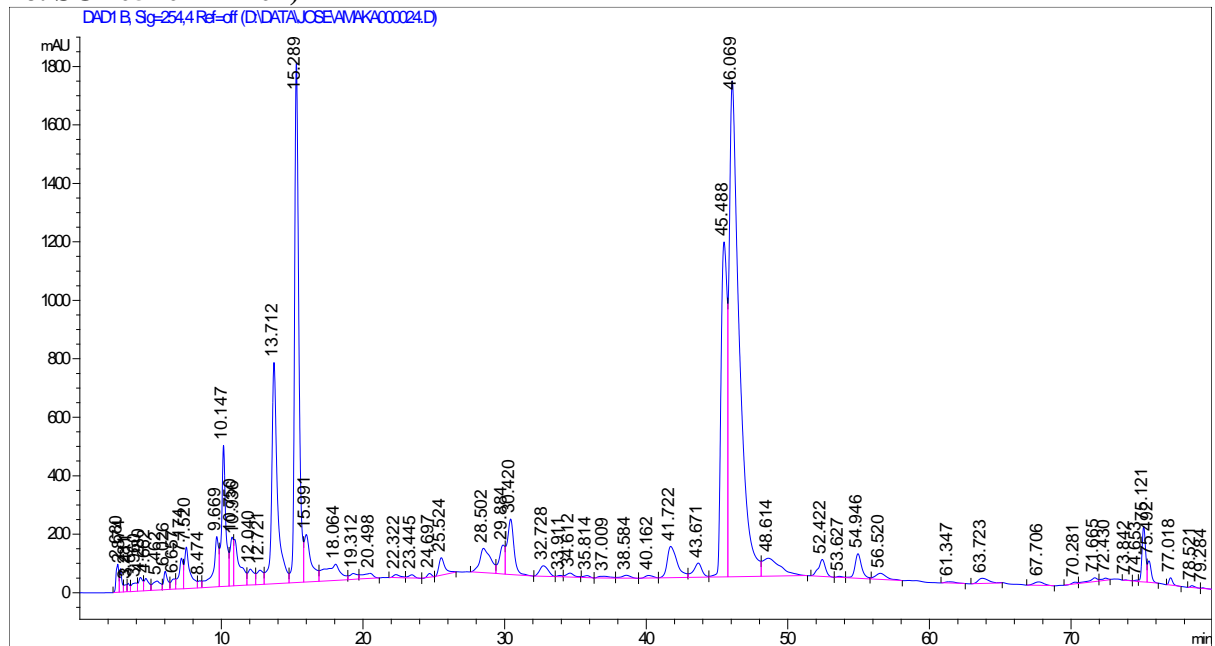



**Supplementary Figure 28S. HPLC chromatogram (254 nm) of *X. americana* (voucher no. SOP052011XA01)**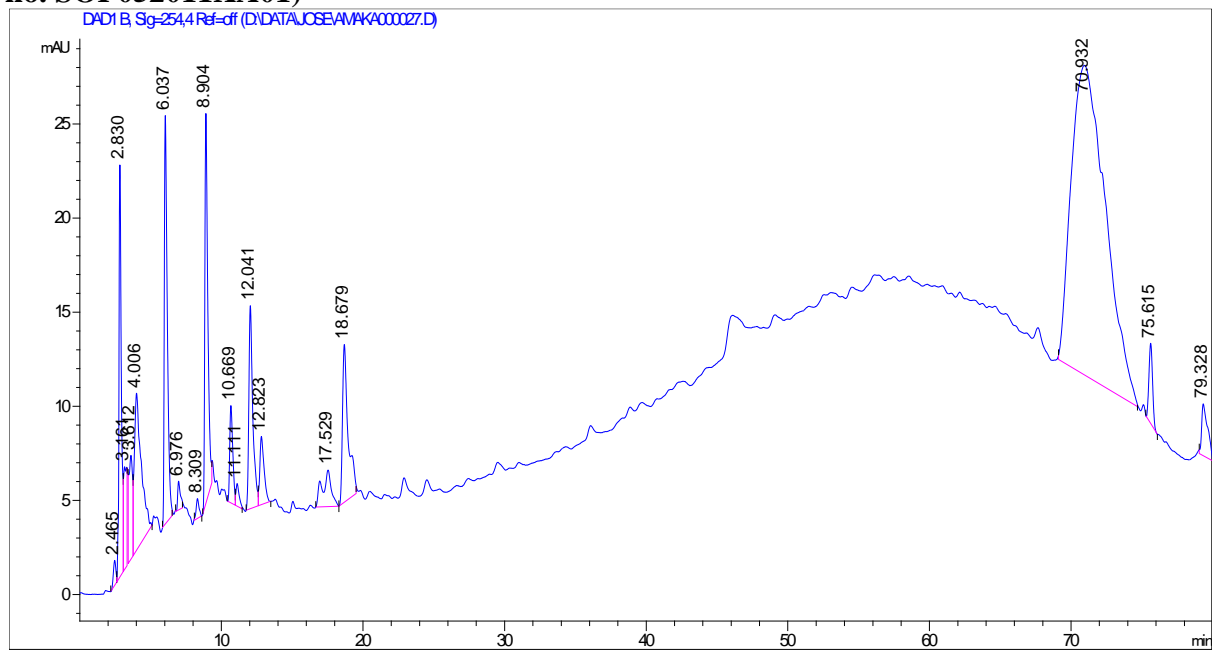



**Supplementary Table 1S: Tabular summary of phenolic compounds present in plant samples**

| <b>Plant name (SampleID)</b>    | <b>Phenolic standards potentially present in sample based on Rt and UV-spectra.</b> | <b>Phenolic standards undetected in the sample but known to be present in specie (Ref: Ezuruike and Prieto, 2014)</b> | <b>Other phenolic compounds known to be present in specie (Ref: Ezuruike and Prieto, 2014)</b>                                                                                                                                                                                                     |
|---------------------------------|-------------------------------------------------------------------------------------|-----------------------------------------------------------------------------------------------------------------------|----------------------------------------------------------------------------------------------------------------------------------------------------------------------------------------------------------------------------------------------------------------------------------------------------|
| <i>A. boonei (AB1)</i>          | Quercitrin                                                                          | None                                                                                                                  | None                                                                                                                                                                                                                                                                                               |
| <i>A. senegalensis (AS1)</i>    | Epigallocatechin, Gallic acid                                                       | Catechin, Epicatechin, Quercetin, Rutin                                                                               | Quercetin-3- <i>O</i> -glucoside (Isoquercetin)                                                                                                                                                                                                                                                    |
| <i>A. leiocarpus (ALI)</i>      | Epigallocatechin, Gallic acid, Ellagic acid                                         | None                                                                                                                  | Castalagin, Chlorogenic acid, Flavogallonic acid, <i>p</i> -Coumaric acid, Protocatechuic acid (3,4-dihydroxybenzoic acid),                                                                                                                                                                        |
| <i>A. djalonensis (AD1/AD2)</i> | None                                                                                | None                                                                                                                  | None                                                                                                                                                                                                                                                                                               |
| <i>A. repenns (ARI)</i>         | None                                                                                | None                                                                                                                  | None                                                                                                                                                                                                                                                                                               |
| <i>B. ferruginea (BS1)</i>      | Epicatechin, Gallic acid                                                            | Kaempferol, Quercitrin, Vitexin                                                                                       | Apigenin, Ferrugin (Tri- <i>O</i> -methylmyricetin), Gallocatechin-(4'- <i>O</i> -7)-epigallocatechin, Isoquercetin, Myricetin, Myricetin- 3-rhamnoside, Quercetin-3-neohesperidoside, Tetra- <i>O</i> - methylmyricetin, Rutisin (Tetra- <i>O</i> -methylquercetin), 3- <i>O</i> -methylquercetin |
| <i>C. sieberiana (CS1/CS2)</i>  | None<br>Epicatechin                                                                 | Quercitrin (Quercetin-3- <i>O</i> -rhamnoside)                                                                        | Epiafzelechin                                                                                                                                                                                                                                                                                      |
| <i>C. filiformis (CF1)</i>      | Gallic acid                                                                         | Rutin (Quercetin-3- <i>O</i> -rutinoside)                                                                             | Isorhamnetin, Isorhamnetin-3- <i>O</i> - $\beta$ -glucoside, Isorhamnetin-3- <i>O</i> -rutinoside, Isorhamnetin-3- <i>O</i> -robinobioside, Quercetin-3- <i>O</i> -robinobioside, Isovanillin, Kaempferol-3- <i>O</i> -robinobioside, Vanillin                                                     |
| <i>D. ogea (DOI)</i>            | Epicatechin, Gallic acid                                                            | None                                                                                                                  | None                                                                                                                                                                                                                                                                                               |

| Plant name (SampleID)             | Phenolic standards potentially present in sample based on Rt and UV-spectra. | Phenolic standards undetected in the sample but known to be present in specie (Ref: Ezuruike and Prieto, 2014) | Other phenolic compounds known to be present in specie (Ref: Ezuruike and Prieto, 2014)                                                                                                                                                                              |
|-----------------------------------|------------------------------------------------------------------------------|----------------------------------------------------------------------------------------------------------------|----------------------------------------------------------------------------------------------------------------------------------------------------------------------------------------------------------------------------------------------------------------------|
| <i>G. latifolium</i> (GL1)        | Caffeic acid, Vitexin rhamnoside                                             | None                                                                                                           | None                                                                                                                                                                                                                                                                 |
| <i>I. doka</i> (ID1)              | None                                                                         | None                                                                                                           | None                                                                                                                                                                                                                                                                 |
| <i>K. ivorensis</i> (KS1/KS3)     | None                                                                         | None                                                                                                           | None                                                                                                                                                                                                                                                                 |
| <i>K. senegalensis</i> (KS2)      | None                                                                         | Catechin, Quercitrin, Rutin                                                                                    | Procyanidin                                                                                                                                                                                                                                                          |
| <i>M. whitei</i> (MW1)            | None                                                                         | None                                                                                                           | Isovanillin (2-hydroxy-4-methoxybenzaldehyde), Vanillin(3- methoxy-4-hydroxybenzaldehyde), 6-methoxy-7- hydroxy coumarin, 6-methoxy-7,8-dihydroxycoumarin                                                                                                            |
| <i>M. oleifera</i> (MO1)          | None                                                                         | None                                                                                                           | Chlorogenicacid, Isoquercetin, Kaempferol glycoside, Rhamnetin, Vanillin                                                                                                                                                                                             |
| <i>O. gratissimum</i> (OG1)       | Caffeic acid                                                                 | Isovitexin, Rutin, Vitexin                                                                                     | Apigenin-7- <i>O</i> -glucosdie, Caffeoyl derivatives, Cichoric acid, Circiliol, Cirsimaritin, Isoquercetin, Isothymusin, Kaempferol-3- <i>O</i> -rutinoside, Luteolin-5- <i>O</i> -glucoside, Luteolin-7- <i>O</i> -glucoside, Nevadensin Rosmarinic acid Vicenin-2 |
| <i>P. nitida</i> (PNI)            | None                                                                         | None                                                                                                           | None                                                                                                                                                                                                                                                                 |
| <i>R. vomitoria</i> (RVI)         | Gallic acid                                                                  | None                                                                                                           | Apigenin rhamnoside, Naringenin                                                                                                                                                                                                                                      |
| <i>R. dulcis</i> (SD1)            | Vitexin                                                                      | Luteolin, Quercetin                                                                                            | Apigenin, Hispidulin, <i>p</i> -Coumaricacid                                                                                                                                                                                                                         |
| <i>S. longipedunculata</i> (S L1) | None                                                                         | Gallic acid, Caffeic acid, Epicatechin, Quercetin, Rutin                                                       | Apigenin, Cinnamic acid, Chlorogenic acid, <i>p</i> -Coumaric acid, Sinapic acid, 3,4,5-tri- <i>O</i> -caffeoylquinic acid, 4,5-di- <i>O</i> -caffeic acid                                                                                                           |
| <i>S. hispidus</i> (SH1)          | None                                                                         | None                                                                                                           | None                                                                                                                                                                                                                                                                 |

| <b>Plant name (SampleID)</b>               | <b>Phenolic standards potentially present in sample based on Rt and UV-spectra.</b> | <b>Phenolic standards undetected in the sample but known to be present in specie (Ref: Ezuruike and Prieto, 2014)</b> | <b>Other phenolic compounds known to be present in specie (Ref: Ezuruike and Prieto, 2014)</b>                                                                                   |
|--------------------------------------------|-------------------------------------------------------------------------------------|-----------------------------------------------------------------------------------------------------------------------|----------------------------------------------------------------------------------------------------------------------------------------------------------------------------------|
| <i>S. guineense</i> (SGI)                  | Gallic acid, Rutin <sup>1</sup>                                                     | None                                                                                                                  | None                                                                                                                                                                             |
| <i>T. indica</i> (TII)                     | None                                                                                | Luteolin, Vitex in                                                                                                    | Apigenin, Naringenin, Procyanidin B2, Vanillin                                                                                                                                   |
| <i>T. bangwensis</i> (ML1)                 | Gallic acid                                                                         | Catechin, Epicatechin, Rutin                                                                                          | Catechin-3-O-rhamnoside, Catechin-7-O-rhamnoside, Epicatechin gallate, Peltoside, Quercetin-3-O-β-D-glucopyranoside, 4-methoxy-catechin-7-O-rhamnoside                           |
| <i>T. avicennioides</i> (TA1) <sup>§</sup> | None                                                                                | Ellagic acid                                                                                                          | Ellagic acid rhamnoside, Flavo-gallonic acid, Punicalagin (Shuaibu et al., 2008) gallic acid (Ekong and                                                                          |
| <i>V. amygdalina</i> (VA1)                 | None                                                                                | Luteolin, Rutin                                                                                                       | Apigenin glucuronide, Caffeoylquinic acid, Chlorogenic acid, Luteolin-7-O-glucoside, Luteolin-7-O-glucuronide, Luteolin-7-O-rutinoside, Luteolin-4-O-rutinoside (Idemudia, 1967) |
| <i>X. americana</i> (XA1)                  | Gallic acid                                                                         | Quercetin, Quercitrin                                                                                                 | Kaempferol-3-O-(6''-gallyolyl)-β-glucopyranoside, Quercetin-3-O-(6''-gallyolyl)-β-glucopyranoside, Quercetin-3-O-β-xylopyranoside                                                |

The compounds highlighted in bold have not been yet reported in the plant species.

§ TA1 isn't reviewed in {Ezuruike and Prieto, 2014} so the references for its identified phenolic compounds are included in the table

***End of Supplementary Materials***

<sup>1</sup> Tankeu, F.N., Pieme, C.A., Biapa Nya, C.P. et al. BMC Complement Altern Med (2016) 16: 315. <https://doi.org/10.1186/s12906-016-1263-1>
